# Supplementary material for: In situ and transcriptomic identification of microglia in synapse-rich regions of the developing zebrafish brain
Source: PubMed Central journal article supplement (PMC8501082; doi:10.1038/s41467-021-26206-x), 2021-10-08
Supplement: 41467_2021_26206_MOESM1_ESM.pdf [file 41467_2021_26206_MOESM1_ESM.pdf]

**Supplementary figures, reagents, and software packages:**

*Tg(mpeg:GFP-CAAX)* 4C4 DAPI at 28 days post fertilization (dpf)

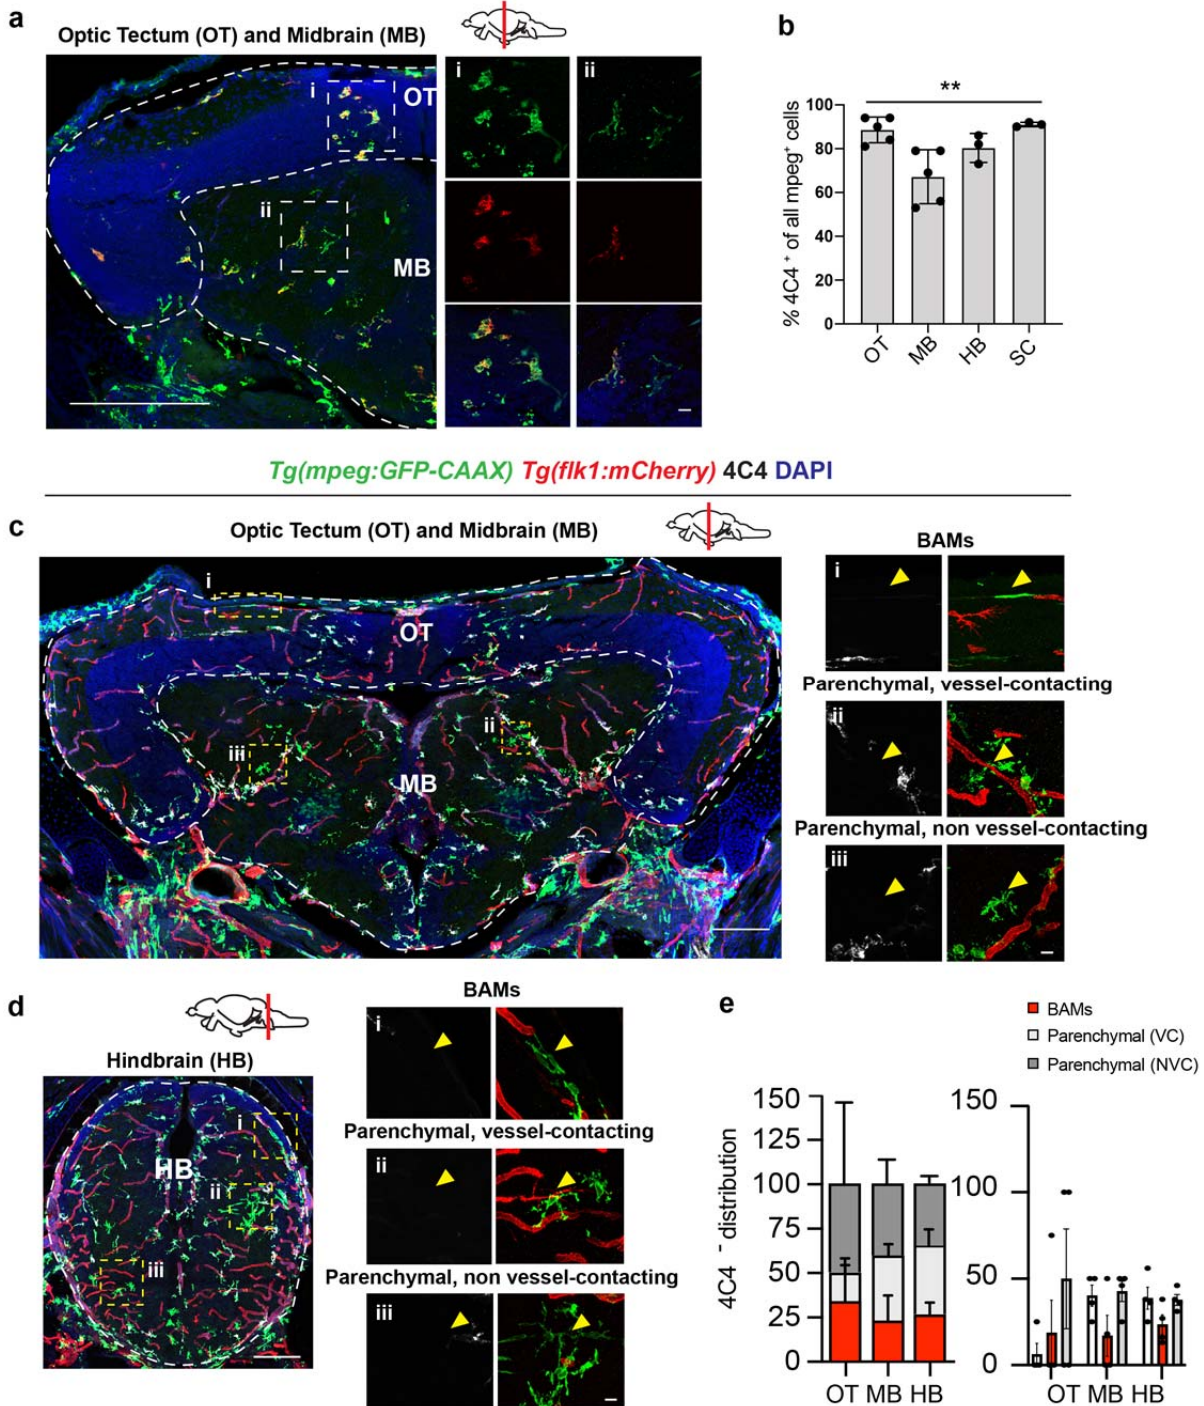

4  
5 **Figure S1. Characterization of 4C4 positive and negative myeloid cells, supplemental to**  
6 **Figure 1.**

7  
8 **(a)** Representative images of OT and MB brain regions using the pan-myeloid reporter line  
9 *mpeg1.1:GFP-CAAX* and the commonly used antibody 4C4 to label presumptive microglia at 28

10 days post fertilization (dpf). Scale: 100  $\mu$ m. Optic tectum (OT), midbrain (MB), and hindbrain  
11 (HB). Insets of boxed areas show separate channels (top) and merged image (bottom) for each  
12 respective region. Scale: 10  $\mu$ m. All images are representative of the n=3 replicates.

13 **(b)** Quantification of percent of *mpeg1.1*:GFP-CAAX<sup>+</sup> population also 4C4 positive. Dots  
14 represent individual fish, data are mean  $\pm$  SD. One way ANOVA; \*\* p = 0.0047.

15 **(c-d)** Characterization of 4C4-negative myeloid cells. Representative images using the pan-  
16 myeloid reporter line Tg(*mpeg1.1*:GFP-CAAX) crossed to vascular reporter line  
17 Tg(*flk1*:*mCherry*), stained with the 4C4 antibody at 30 dpf. i) Insets highlighting *mpeg1.1*: GFP-  
18 CAAX<sup>+</sup> 4C4 negative border associated macrophages (BAMs) at the brain surface, ii) insets of  
19 representative *mpeg1.1*: GFP-CAAX<sup>+</sup> 4C4-negative ramified parenchymal cell contacting a  
20 blood vessel; note, these cells lacked elongated perivascular macrophage morphology seen in  
21 mammalian PVMs. iii) Insets highlighting a *mpeg1.1*:GFP-CAAX<sup>+</sup> 4C4-negative, ramified,  
22 parenchymal, non-vessel contacting cell. Scale: 10  $\mu$ m. All images are representative of the n=3  
23 replicates.

24 **(e)** Distribution of the 4C4-negative *mpeg1.1*:GFP-CAAX<sup>+</sup> cell population across the three  
25 morphologically and regionally defined subsets shown in C-D. Dots represent individual fish  
26 (n=4), data are mean  $\pm$  SEM. Scale: 100  $\mu$ m. Optic tectum (OT), midbrain (MB), and hindbrain  
27 (HB).

28  
29  
30  
31  
32  
33  
34  
35  
36  
37  
38  
39  
40  
41  
42  
43  
44  
45  
46  
47  
48  
49  
50  
51  
52  
53  
54  
55

56  
57  
58  
59

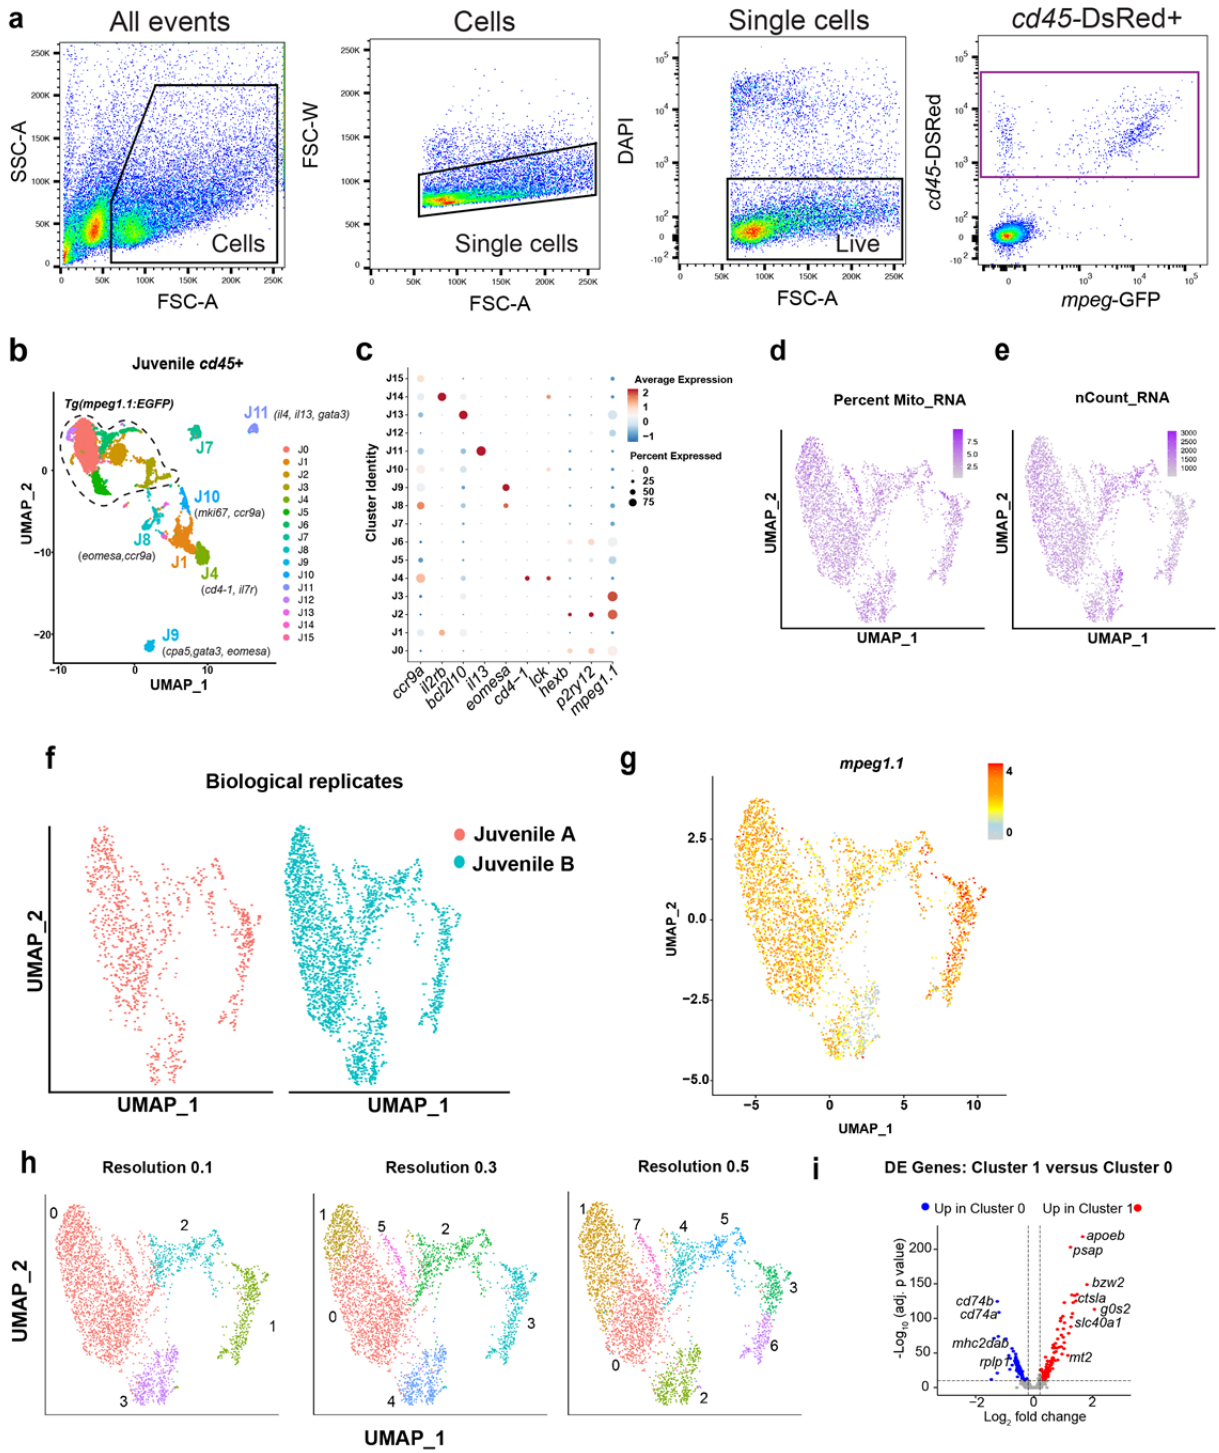

60  
61  
62  
63

Figure S2. Gating hierarchy and quality control of single cell sequencing data, supplemental to Figure 2.

64  
65 **(a)** Gating strategy to isolate *cd45* positive cells for single-cell RNA sequencing data in Figure 2  
66 a-g. The violet gate represents the total *cd45*-DsRed<sup>+</sup> population that was sequenced.  
67 **(b)** Unsupervised clustering of juvenile *cd45* positive cells, replicated from Fig. 2b for reference.  
68 **(c)** Select enriched genes in *cd45+mpeg1.1* immune cell subsets calculated with the MAST DE  
69 algorithm in Seurat. Size represents percent of cells expressing each gene while color  
70 represents normalized and scaled gene expression compared to all clusters; decreased  
71 expression: blue, expression unchanged: white, increased expression: red.  
72 **(d-e)** Feature plot showing distribution of mitochondrial RNA content and genes recovered  
73 (nCount) per cell.  
74 **(f)** Comparison of independent biological replicates of *mpeg1.1*<sup>+</sup> cells pooled in Fig. 2c.  
75 **(g)** UMAP plot highlighting levels of *mpeg1.1* expression the *mpeg1.1*<sup>+</sup> population from 2c.  
76 **(h)** UMAP plots showing the effects of changing the clustering resolution on unsupervised  
77 clustering in Seurat with the FindClusters function. Clustering resolutions 0.1, 0.3, and 0.5 are  
78 shown.  
79 **(i)** Volcano plot of differentially expressed genes between clusters JM1 (cluster 1) and JM0  
80 (cluster 0) using a clustering resolution of 0.3. The MAST DE algorithm in Seurat was used to  
81 calculate log fold changes. Thresholds represented by dotted lines were set to adjusted p value  
82  $<10^{-10}$ , log(2) fold change  $> 0.2$ .

83  
84  
85  
86  
87  
88  
89  
90  
91  
92  
93  
94  
95  
96  
97  
98  
99  
100  
101  
102  
103  
104  
105  
106  
107  
108  
109

110  
111  
112  
113  
114

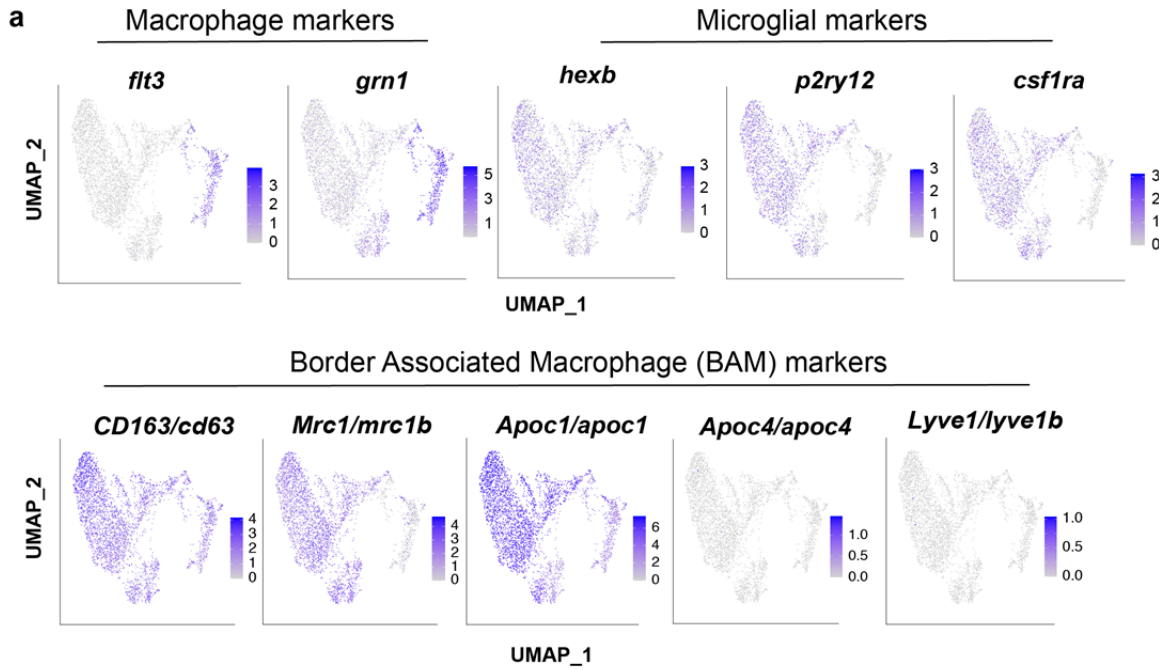

115  
116 **Figure S3: Feature plots of macrophage, microglia, and mammalian BAMs, supplemental**  
117 **to Figure 2.**

118  
119 **(a)** Feature plots from juvenile single-cell RNA dataset from Fig. 2C, showing canonical  
120 macrophage and microglia markers (top), and several proposed mammalian border associated  
121 macrophage (BAM) signature genes<sup>39,56</sup> with known homologs in fish (labels indicate  
122 mammalian/zebrafish homologs, bottom).

123  
124  
125  
126

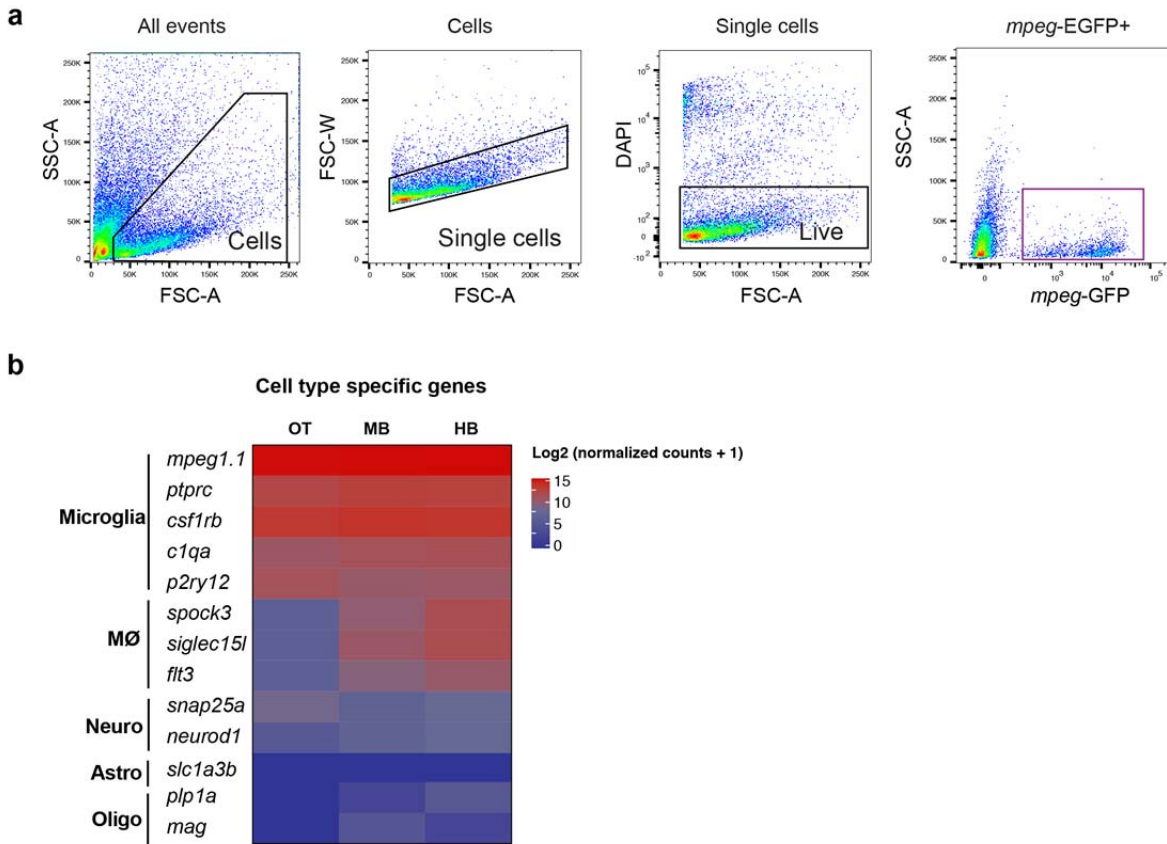

128

129

**Figure S4. Gating strategy and quality control of bulk sequencing data, supplemental to Figure 3.**

130

131

**(a)** Gating strategy to isolate *mpeg1.1-EGFP+* myeloid cells for region-specific bulk sequencing data in Figure 3A-C. The violet gate represents the *mpeg1.1-EGFP+* population that was sequenced.

134

**(b)** Heatmap of selected microglia, macrophage, neuronal, astrocyte, and oligodendrocyte genes.

136

Optic tectum (OT), midbrain (MB), and hindbrain (HB). Log-normalized counts generated with DESeq2.

138

139

140

141

142

143

144

145

146

147

148

149

150

a

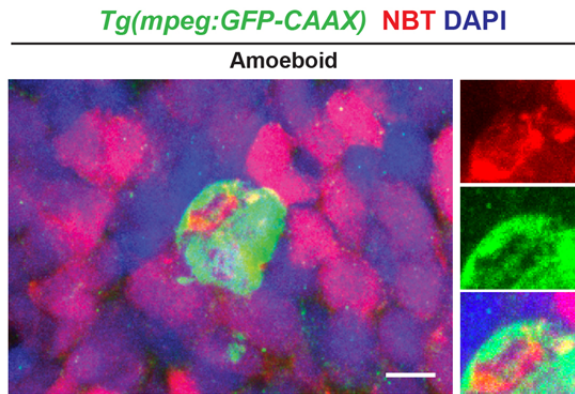

b

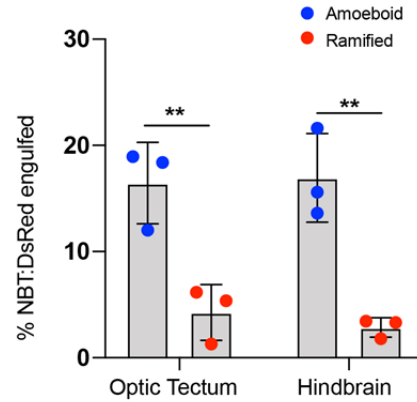

151  
152  
153  
154  
155  
156  
157  
158  
159  
160  
161  
162  
163  
164  
165  
166  
167  
168  
169  
170  
171  
172  
173  
174  
175  
176  
177  
178  
179  
180  
181  
182

**Figure S5. Neuronal engulfment in the OT and HB at 28 dpf, supplemental to Figure 4.**

**(a-b)** Representative image and quantification of *NBT:DsRed* neuronal bodies within ramified or amoeboid microglia (Sphericity > .6) from OT and HB brain regions. Two separate t-tests, \*\* $p < 0.01$ ,  $n=3$  microglia per fish;  $n=3$  represented as mean values. Scale bar: 10  $\mu\text{m}$ . All images are representative of the  $n=3$  replicates.



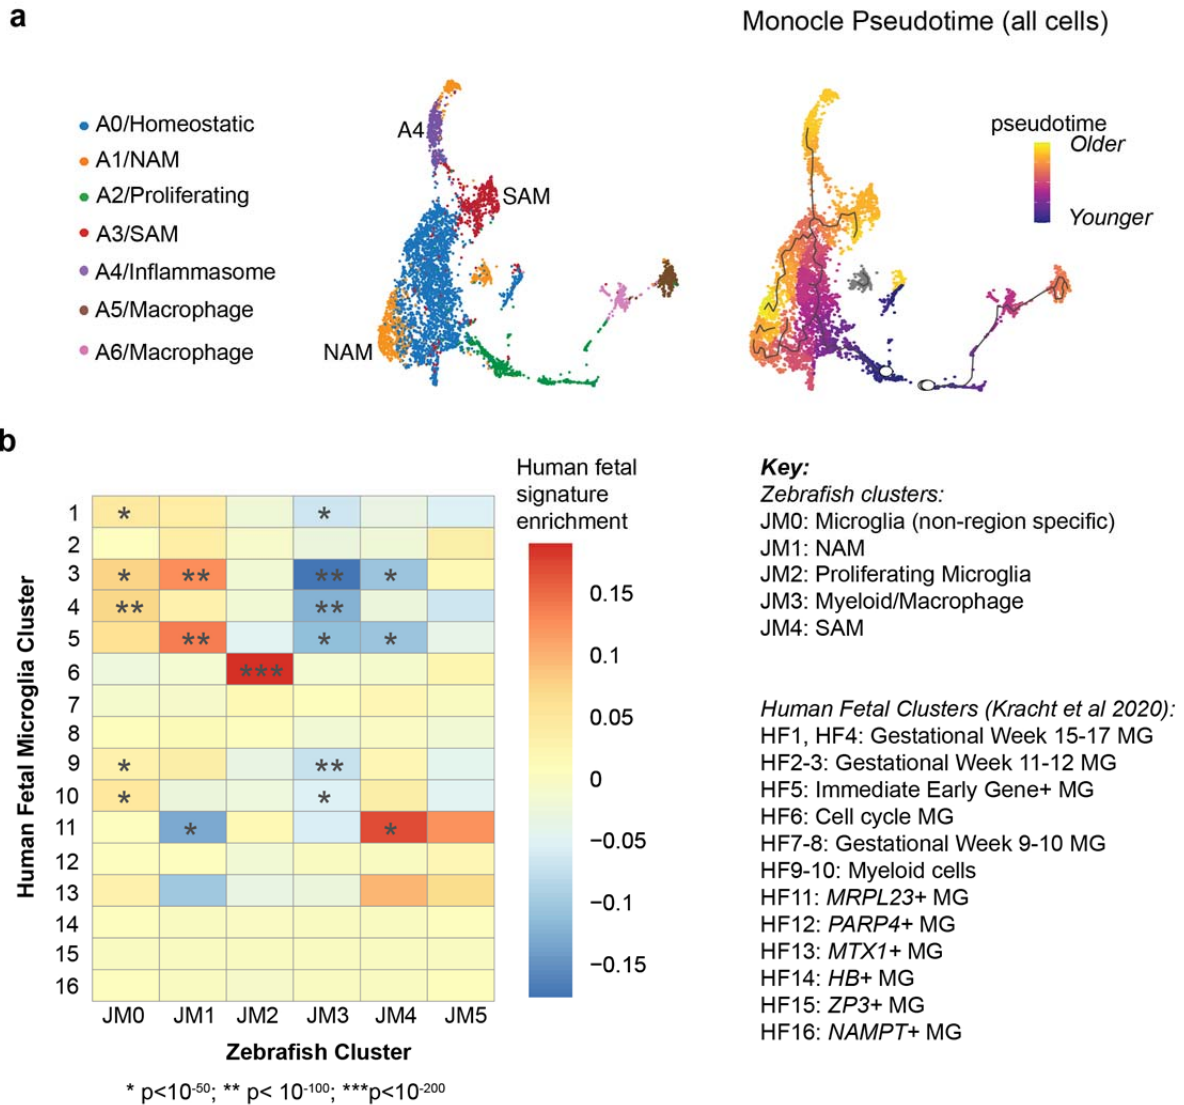

183  
184 **Figure S6. Human fetal microglia (Kracht et al., 2020) comparison to juvenile zebrafish**  
185 **microglia and pseudotime analysis, supplemental to Figure 4.**  
186

187 **(a)** Pseudotime analysis with Monocle 3<sup>48</sup> on both juvenile and adult *mpeg1.1* positive cell  
188 populations. Left UMAP plot is colored by cluster, right colored by estimated pseudotime using  
189 dividing cells as a starting point.  
190

191 **(b)** Heatmap comparing juvenile zebrafish microglial clusters to a single-cell human fetal  
192 microglia dataset (Kracht et al 2020, table S3)<sup>49</sup>. Cells are colored by signature enrichment  
193 (estimated increase in average eigengene expression calculated with the AddModuleScore  
194 function in Seurat) in the listed zebrafish cluster compared to all other zebrafish clusters. (Two-  
195 sided Wilcoxon Rank-Sum Test, \* $p < 10^{-50}$ , \*\* $p < 10^{-100}$ , \*\*\* $p < 10^{-200}$ ).

196  
197  
198

199  
200  
201  
202

**List of key reagents and software packages**

| REAGENT or Software package                                      | SOURCE                  | IDENTIFIER                                                                           |
|------------------------------------------------------------------|-------------------------|--------------------------------------------------------------------------------------|
| Antibodies                                                       |                         |                                                                                      |
| Chicken anti-GFP 1:1000                                          | Aves Labs               | Cat#GFP-1020,<br>RRID:AB10000240                                                     |
| Rabbit anti-DsRed 1:1000                                         | Takara Bio              | Cat#632496;RRID:AB-<br>_10013483                                                     |
| Mouse anti-synaptic vesicle glycoprotein 2A (SV2) 1:500          | DHSB                    | RRID: AB_2315387                                                                     |
| Rat anti-BrdU 1:500                                              | Abcam                   | Cat#ab6326;RRID:AB_305426                                                            |
| Mouse anti-4C4 1:200                                             | Gift from Hitchcock Lab | Cat#92092321;RRID:AB_10013752                                                        |
| Anti-Digoxigenin-AP, Fab Fragments 1:500                         | Roche                   | Cat#11093274910,RRID:AB_2734716                                                      |
| Alexa Fluor 488 goat anti-chicken 1:500                          | Thermo Fisher           | Cat#A-11039;RRID:AB_2534096                                                          |
| Alexa Fluor 555 goat anti-mouse 1:500                            | Thermo Fisher           | Cat#A-21422,<br>RRID:AB_141822                                                       |
| Alexa Fluor 555 goat anti-rabbit 1:500                           | Thermo Fisher           | Cat# A-21429;RRID:AB_2535850                                                         |
| Alexa Fluor 647 goat anti-mouse 1:500                            | Thermo Fisher           | Cat# A-21235;<br>RRID:AB_2535804                                                     |
| Alexa Fluor 647 goat anti-Rat 1:500                              | Thermo Fisher           | Cat# A-21248;<br>RRID:AB_2535816                                                     |
|                                                                  |                         |                                                                                      |
| Critical Commercial Assays                                       |                         |                                                                                      |
| Chromium single cell gene expression platform, version 3         | 10x Genomics            | Library and gel bead kit-V3, 120267;Chip B kit:1000009                               |
| SIGMAFAST Fast Red TR/Naphthol AS-MX Tablets                     | Sigma-Aldrich           | C# F4648                                                                             |
| ProSense 680 Fluorescent Imaging Agent                           | PerkinElmer             | C#NEV10003                                                                           |
|                                                                  |                         |                                                                                      |
| Deposited Data                                                   |                         |                                                                                      |
| Single cell RNA-Sequencing of microglia from juvenile and adults | Gene Expression Omnibus | <a href="https://www.ncbi.nlm.nih.gov/geo/query/acc.cgi?acc=GSE164771">GSE164771</a> |
| Bulk RNA-sequencing of microglia from OT, MB, HB brain regions   | Gene Expression Omnibus | <a href="https://www.ncbi.nlm.nih.gov/geo/query/acc.cgi?acc=GSE164772">GSE164772</a> |
|                                                                  |                         |                                                                                      |
| Experimental Models: Organisms/Strains                           |                         |                                                                                      |
| Zebrafish: <i>Tg(mpeg1.1:EGFP)</i>                               | <sup>57</sup>           | ZFIN: ZDB-ALT-0000                                                                   |
| Zebrafish: <i>Tg(cd45:DsRed)</i>                                 | <sup>33</sup>           |                                                                                      |
| Oligonucleotides                                                 |                         |                                                                                      |
| <i>cd74a</i> ISH primers,                                        | In house                | F:<br>TAATACGACTCACTATAGGGG<br>GACAGGAGAACTCAAGG;R:<br>AATTAACCCTCACTAAAGGGC         |

|                            |                    |                                                                                                                                                     |
|----------------------------|--------------------|-----------------------------------------------------------------------------------------------------------------------------------------------------|
|                            |                    | CATCCCAAACAACATGC                                                                                                                                   |
| <i>ctspa</i> ISH primers,  | In house           | F:<br>TAATACGACTCACTATAGGGA<br>TGCAAGAGAGCAGTGG; R:<br>AATTAACCCTCACTAAAGGGA<br>AGTCCAATGAGCAGGTC                                                   |
| Seurat (Version 3.1.4)     | <sup>58</sup>      | <a href="https://satijalab.org/seurat">https://satijalab.org/seurat</a>                                                                             |
| STAR (Version 2.5.4b)      | <sup>59</sup>      | <a href="https://github.com/alexdobin/STAR/releases">https://github.com/alexdobin/STAR/releases</a>                                                 |
| DESeq2 package (Version 4) | <sup>60</sup>      | <a href="http://www.bioconductor.org/packages/release/bioc/html/DESeq2.html">http://www.bioconductor.org/packages/release/bioc/html/DESeq2.html</a> |
| Harmony (Version 1.0)      |                    |                                                                                                                                                     |
| ImageJ                     | NIH                | RRID: SCR_003070                                                                                                                                    |
| Imaris                     | Oxford Instruments | RRID: SCR_007370                                                                                                                                    |
| Prism                      | GraphPad           | RRID: SCR_002798                                                                                                                                    |

203  
204  
205  
206  
207  
208  
209  
210  
211  
212  
213  
214  
215  
216  
217  
218  
219  
220  
221  
222  
223  
224  
225  
226  
227  
228  
229  
230  
231  
232  
233

### Supplemental dataset excel files:

#### Data S1: Pan hematopoietic single cell clusters in 28 dpf zebrafish brain

Legend: Differentially expressed genes per cluster for all juvenile (28 dpf) zebrafish CD45+ cells, as shown in Fig. 2b, S2b. First tab includes all clusters; further tabs are subsets of the first tab for each individual cluster. Column 1 (“gene”) = gene name; column 2 (“p\_val”) = unadjusted p-value calculated with the MAST test in Seurat. Column 3 (“avg\_logFC”) = average natural log fold change for that gene between the labelled cluster (column 7, “cluster”) and all other cells. Column 4 (“pct.1”) = fraction of cells in the labelled cluster expressing that gene. Column 5 (“pct.2”) = fraction of cells outside of the labelled cluster expressing that gene. Column 6 (“p\_val\_adj”) = Bonferroni adjusted p-value per gene. Column 7 (“cluster”) = cluster shown in UMAP plots referenced above. Filtered to show p\_val\_adj < 0.001, avg\_logFC>0.2.

#### Data S2: Myeloid single cell clusters in 28 dpf zebrafish brain

Legend: Differentially expressed genes per cluster for all juvenile (28 dpf) myeloid (*mpeg1.1+*) cells, as shown in Fig. 2C. First tab includes all clusters; further tabs are subsets of the first tab for each individual cluster. Column 1 (“gene”) = gene name; column 2 (“p\_val”) = unadjusted p-value calculated with the MAST test in Seurat. Column 3 (“avg\_logFC”) = average natural log fold change for that gene between the labelled cluster (column 7, “cluster”) and all other cells. Column 4 (“pct.1 [in cluster]”) = fraction of cells in the labelled cluster expressing that gene. Column 5 (“pct.2 [out of cluster]”) = fraction of cells outside of the labelled cluster expressing that gene. Column 6 (“p\_val\_adj”) = Bonferroni adjusted p-value per gene. Column 7 (“cluster”) = cluster shown in UMAP plots referenced above. Filtered to show p\_val\_adj < 0.001, avg\_logFC>0.2.

#### Data S3: Adult and juvenile single cell clusters

Legend: Differentially expressed genes per cluster for all juvenile (28 dpf) and adult (12 months) myeloid (*mpeg1.1+*) cells, as shown in Fig. 2e. First tab includes all clusters; further

234 tabs are subsets of the first tab for each individual cluster. Column 1 (“gene”) = gene name;  
235 column 2 (“p\_val”) = unadjusted p-value calculated with the MAST test in Seurat. Column 3  
236 (“avg\_logFC”) = average natural log fold change for that gene between the labelled cluster  
237 (column 7, “cluster”) and all other cells. Column 4 (“pct.1 [in cluster]”) = fraction of cells in the  
238 labelled cluster expressing that gene. Column 5 (“pct.2 [out of cluster]”) = fraction of cells  
239 outside of the labelled cluster expressing that gene. Column 6 (“p\_val\_adj”) = Bonferroni  
240 adjusted p-value per gene. Column 7 (“cluster”) = cluster shown in UMAP plots referenced  
241 above. Filtered to show  $p\_val\_adj < 0.001$ ,  $avg\_logFC > 0.2$ .

242  
243

#### 244 **Data S4: Region specific myeloid cell profiling in 28 dpf zebrafish brain**

245

246 Legend: Differentially expressed genes calculated from bulk sequencing data comparing three  
247 brain regions (tab 1: hindbrain (HB, lfc >0 ) vs midbrain (MB, lfc <0); tab 2: optic tectum (OT, lfc  
248 >0) vs hindbrain (HB, lfc <0); tab 3: optic tectum (OT, lfc >0) vs midbrain (MB, lfc < 0). Statistics  
249 were conducted using the DESeq2 package in R, and results were filtered to  $p\_adj < 0.05$ .  
250 Column 1 (“Ensembl\_ID”): gene-specific Ensembl ID; Column 2 (“Gene\_ID”): gene name (if  
251 available); Column 3 (“baseMean”): mean normalized gene expression over both samples,  
252 corrected for size factors; Column 4 (“log2FoldChange”): Log base 2 fold change gene  
253 expression in the first listed brain region compared to the second listed brain region. Positive  
254 values indicate enrichment in the first listed brain region; Column 5 (“lfcSE”): log fold change  
255 standard error estimate; Column 6 (“stat”): Wald test statistic value for the gene; Column 7  
256 (“pvalue”); p-value associated with the test statistic; Column 8 (“padj”): Benjamini-Hochberg  
257 (FDR < 0.05) corrected p-value.

258

#### 259 **Data S5: Differentially expressed genes between HB-enriched cluster JM4 and OT- 260 enriched cluster JM1.**

261

262 **Legend: Differentially expressed genes between clusters JM4 and JM1, as shown in Fig.**  
263 **4d.** Column 1 (“gene”) = gene name; column 2 (“p\_val”) = unadjusted p-value calculated with  
264 the MAST test in Seurat. Column 3 (“avg\_logFC”) = average natural log fold change for that  
265 gene between cluster JM4 and JM1. Positive values represent increases in cluster JM4 with  
266 respect to JM1, while negative values represent genes increased in cluster JM1 with respect to  
267 JM4. Column 4 (“pct.JM4”) = fraction of cells in cluster JM4 expressing that gene. Column 5  
268 (“pct.JM1”) = fraction of cells in cluster JM1 expressing that gene. Column 6 (“p\_val\_adj”) =  
269 Bonferroni adjusted p-value per gene. Column 7 (“cluster”) = cluster shown in UMAP plots  
270 referenced above. Filtered to show genes with  $p\_val\_adj < 0.001$ ,  $avg\_logFC > 0.2$ .

271

272

273
